# Supplementary material for: Molecular adaptation and resilience of the insect’s nuclear receptor USP
Source: PubMed Central journal article supplement (PMC3520820; doi:10.1186/1471-2148-12-199), 2012-10-05
Supplement: 1471-2148-12-199-S2.pdf [file 1471-2148-12-199-S2.pdf]

| Drosophilidae |    |       | Diptera |    | Lepidoptera |    | Tenebrionidae |     | Blattidae |    |       |
|---------------|----|-------|---------|----|-------------|----|---------------|-----|-----------|----|-------|
| dmel          | M7 | dN/dS | dmel    | M8 | hvir        | M7 | tcas          | M7  | bger      | M8 | dN/dS |
|               |    |       |         |    | 1           | L  |               |     |           |    |       |
|               |    |       |         |    | 2           | N  |               |     |           |    |       |
|               |    |       |         |    | 3           | L  |               |     |           |    |       |
|               |    |       |         |    | 4           | E  |               |     |           |    |       |
|               |    |       |         |    | 5           | G  |               |     |           |    |       |
|               |    |       |         |    | 6           | G  |               |     |           |    |       |
|               |    |       |         |    | 7           | F  |               |     |           |    |       |
|               |    |       |         |    | 8           | M  |               |     |           |    |       |
|               |    |       |         |    | 9           | S  |               |     |           |    |       |
|               |    |       |         |    | 10          | P  |               |     |           |    |       |
|               |    |       |         |    | 11          | M  |               |     |           |    |       |
|               |    |       |         |    | 12          | S  |               |     |           |    |       |
|               |    |       |         |    | 13          | P  |               |     |           |    |       |
|               |    |       |         |    | 14          | P  |               |     |           |    |       |
|               |    |       |         |    | 15          | E  |               |     |           |    |       |
|               |    |       |         |    | 16          | M  |               |     |           |    |       |
|               |    |       |         |    | 17          | K  |               |     |           |    |       |
|               |    |       |         |    | 18          | P  |               |     |           |    |       |
|               |    |       |         |    | 19          | D  |               |     |           |    |       |
|               |    |       |         |    | 20          | T  |               |     |           |    |       |
|               |    |       |         |    | 21          | A  |               |     |           |    |       |
|               |    |       |         |    | 22          | M  |               |     |           |    |       |
|               |    |       |         |    | 23          | L  |               |     |           |    |       |
|               |    |       |         |    | 24          | D  |               |     |           |    |       |
|               |    |       |         |    | 25          | G  |               |     |           |    |       |
|               |    |       |         |    | 26          | L  |               |     |           |    |       |
|               |    |       |         |    | 27          | R  |               |     |           |    |       |
|               |    |       |         |    | 28          | D  |               |     |           |    |       |
|               |    |       |         |    | 29          | D  |               |     |           |    |       |
|               |    |       |         |    | 30          | S  |               |     |           |    |       |
|               |    |       |         |    | 31          | T  |               |     |           |    |       |
| 1             | S  | 0,0   |         |    | 32          | P  |               |     |           |    |       |
| 2             | P  | 0,0   |         |    | 33          | P  |               |     |           |    |       |
| 3             | K  | 0,0   |         |    | 34          | P  |               |     |           |    |       |
| 4             | A  | 0,0   |         |    | 35          | A  |               |     |           |    |       |
| 5             | E  | 0,0   |         |    | 36          | F  |               |     |           |    |       |
|               |    |       |         |    | 37          | K  |               |     |           |    |       |
|               |    |       |         |    | 38          | N  |               |     |           |    |       |
| 6             | S  | 0,1   |         |    |             |    |               |     |           |    |       |
| 7             | P  | 0,0   |         |    |             |    |               |     |           |    |       |
| 8             | V  | 0,1   |         |    |             |    |               |     |           |    |       |
| 9             | P  | 0,0   |         |    |             |    |               |     |           |    |       |
| 10            | F  | 0,0   |         |    |             |    |               |     |           |    |       |
| 11            | M  | 0,1   |         |    |             |    |               |     |           |    |       |
| 12            | Q  | 0,0   |         |    |             |    |               |     |           |    |       |
| 13            | A  | 0,2   |         |    |             |    |               |     |           |    |       |
| 14            | M  | 0,0   |         |    |             |    |               |     |           |    |       |
| 15            | S  | 0,1   |         |    |             |    |               |     |           |    |       |
| 16            | M  | 0,0   |         |    |             |    |               |     |           |    |       |
| 17            | V  | 0,1   |         |    |             |    |               |     |           |    |       |
| 18            | H  | 0,1   |         |    |             |    |               |     |           |    |       |
| 19            | V  | 0,0   |         |    |             |    |               |     |           |    |       |
| 20            | Y  | 0,0   | 1       | Y  | 0,0         | 39 | Y             | 0,0 |           |    |       |
| 21            | P  | 0,0   | 2       | P  | 0,0         | 40 | P             | 0,0 |           |    |       |
| 22            | P  | 0,0   | 3       | P  | 0,0         | 41 | P             | 0,0 |           |    |       |
| 23            | N  | 0,0   | 4       | N  | 0,0         | 42 | N             | 0,0 |           |    |       |
| 24            | H  | 0,0   | 5       | H  | 0,0         | 43 | H             | 0,0 |           |    |       |
| 25            | P  | 0,0   | 6       | P  | 0,0         | 44 | P             | 0,0 | 1         | P  | 0,0   |
| 26            | L  | 0,0   | 7       | L  | 0,0         | 45 | L             | 0,0 | 2         | L  | 0,0   |
| 27            | S  | 0,0   | 8       | S  | 0,0         | 46 | S             | 0,0 | 3         | S  | 0,0   |
| 28            | G  | 0,1   | 9       | G  | 0,0         | 47 | G             | 0,0 | 4         | G  | 0,0   |
| 29            | S  | 0,1   | 10      | S  | 0,1         | 48 | S             | 0,0 | 5         | S  | 0,0   |
| 30            | K  | 0,0   | 11      | K  | 0,0         | 49 | K             | 0,0 | 6         | K  | 0,0   |
| 31            | H  | 0,0   | 12      | H  | 0,0         | 50 | H             | 0,0 | 7         | H  | 0,0   |
| 32            | L  | 0,0   | 13      | L  | 0,0         | 51 | L             | 0,0 | 8         | L  | 0,0   |
| 33            | C  | 0,0   | 14      | C  | 0,0         | 52 | C             | 0,0 | 9         | C  | 0,0   |

|     |   |     |    |   |     |     |   |     |    |    |     |     |   |     |
|-----|---|-----|----|---|-----|-----|---|-----|----|----|-----|-----|---|-----|
| 34  | S | 0,0 | 15 | S | 0,0 | 53  | S | 0,0 |    | 10 | S   | 0,0 |   |     |
| 35  | I | 0,0 | 16 | I | 0,0 | 54  | I | 0,0 |    | 11 | I   | 0,0 |   |     |
| 36  | C | 0,0 | 17 | C | 0,0 | 55  | C | 0,0 |    | 12 | C   | 0,0 |   |     |
| 37  | G | 0,0 | 18 | G | 0,0 | 56  | G | 0,0 |    | 13 | G   | 0,0 |   |     |
| 38  | D | 0,0 | 19 | D | 0,0 | 57  | D | 0,0 |    | 14 | D   | 0,0 |   |     |
| 39  | R | 0,0 | 20 | R | 0,0 | 58  | R | 0,0 |    | 15 | R   | 0,0 |   |     |
| 40  | A | 0,0 | 21 | A | 0,0 | 59  | A | 0,0 |    | 16 | A   | 0,0 |   |     |
| 41  | S | 0,0 | 22 | S | 0,0 | 60  | S | 0,0 |    | 17 | S   | 0,0 |   |     |
| 42  | G | 0,0 | 23 | G | 0,0 | 61  | G | 0,0 |    | 18 | G   | 0,0 |   |     |
| 43  | K | 0,0 | 24 | K | 0,0 | 62  | K | 0,0 |    | 19 | K   | 0,0 |   |     |
| 44  | H | 0,0 | 25 | H | 0,0 | 63  | H | 0,0 |    | 20 | H   | 0,0 |   |     |
| 45  | Y | 0,0 | 26 | Y | 0,0 | 64  | Y | 0,0 |    | 21 | Y   | 0,0 |   |     |
| 46  | G | 0,0 | 27 | G | 0,0 | 65  | G | 0,0 |    | 22 | G   | 0,0 |   |     |
| 47  | V | 0,0 | 28 | V | 0,0 | 66  | V | 0,0 |    | 23 | V   | 0,0 |   |     |
| 48  | Y | 0,0 | 29 | Y | 0,0 | 67  | Y | 0,0 |    | 24 | Y   | 0,0 |   |     |
| 49  | S | 0,0 | 30 | S | 0,0 | 68  | S | 0,0 |    | 25 | S   | 0,0 |   |     |
| 50  | C | 0,0 | 31 | C | 0,0 | 69  | C | 0,0 |    | 26 | C   | 0,0 |   |     |
| 51  | E | 0,0 | 32 | E | 0,0 | 70  | E | 0,0 |    | 27 | E   | 0,0 |   |     |
| 52  | G | 0,0 | 33 | G | 0,0 | 71  | G | 0,0 |    | 28 | G   | 0,0 |   |     |
| 53  | C | 0,0 | 34 | C | 0,0 | 72  | C | 0,0 |    | 29 | C   | 0,0 |   |     |
| 54  | K | 0,0 | 35 | K | 0,0 | 73  | K | 0,0 |    | 30 | K   | 0,0 |   |     |
| 55  | G | 0,0 | 36 | G | 0,0 | 74  | G | 0,0 |    | 31 | G   | 0,0 |   |     |
| 56  | F | 0,0 | 37 | F | 0,0 | 75  | F | 0,0 |    | 32 | F   | 0,0 |   |     |
| 57  | F | 0,0 | 38 | F | 0,0 | 76  | F | 0,0 |    | 33 | F   | 0,0 |   |     |
| 58  | K | 0,0 | 39 | K | 0,0 | 77  | K | 0,0 |    | 34 | K   | 0,0 |   |     |
| 59  | R | 0,0 | 40 | R | 0,0 | 78  | R | 0,0 | 1  | R  | 0,0 | 35  | R | 0,0 |
| 60  | T | 0,0 | 41 | T | 0,0 | 79  | T | 0,0 | 2  | T  | 0,0 | 36  | T | 0,0 |
| 61  | V | 0,0 | 42 | V | 0,0 | 80  | V | 0,0 | 3  | V  | 0,0 | 37  | V | 0,0 |
| 62  | R | 0,0 | 43 | R | 0,0 | 81  | R | 0,0 | 4  | R  | 0,0 | 38  | R | 0,0 |
| 63  | K | 0,0 | 44 | K | 0,0 | 82  | K | 0,0 | 5  | K  | 0,0 | 39  | K | 0,0 |
| 64  | D | 0,0 | 45 | D | 0,0 | 83  | D | 0,0 | 6  | D  | 0,0 | 40  | D | 0,0 |
| 65  | L | 0,0 | 46 | L | 0,0 | 84  | L | 0,0 | 7  | L  | 0,0 | 41  | L | 0,0 |
| 66  | T | 0,1 | 47 | T | 0,0 | 85  | T | 0,2 | 8  | S  | 0,0 | 42  | S | 0,0 |
| 67  | Y | 0,0 | 48 | Y | 0,0 | 86  | Y | 0,0 | 9  | Y  | 0,0 | 43  | Y | 0,0 |
| 68  | A | 0,0 | 49 | A | 0,0 | 87  | A | 0,0 | 10 | A  | 0,0 | 44  | A | 0,0 |
| 69  | C | 0,0 | 50 | C | 0,0 | 88  | C | 0,0 | 11 | C  | 0,0 | 45  | C | 0,0 |
| 70  | R | 0,0 | 51 | R | 0,0 | 89  | R | 0,0 | 12 | R  | 0,0 | 46  | R | 0,0 |
| 71  | E | 0,0 | 52 | E | 0,0 | 90  | E | 0,0 | 13 | E  | 0,0 | 47  | E | 0,0 |
| 72  | N | 0,0 | 53 | N | 0,0 | 91  | E | 0,1 | 14 | E  | 0,1 | 48  | D | 0,0 |
| 73  | R | 0,0 | 54 | R | 0,0 | 92  | R | 0,1 | 15 | K  | 0,0 | 49  | K | 0,0 |
| 74  | N | 0,0 | 55 | N | 0,0 | 93  | N | 0,0 | 16 | N  | 0,0 | 50  | N | 0,0 |
| 75  | C | 0,0 | 56 | C | 0,0 | 94  | C | 0,0 | 17 | C  | 0,0 | 51  | C | 0,0 |
| 76  | I | 0,0 | 57 | I | 0,1 | 95  | I | 0,0 | 18 | I  | 0,0 | 52  | I | 0,0 |
| 77  | I | 0,0 | 58 | I | 0,0 | 96  | I | 0,0 | 19 | I  | 0,0 | 53  | I | 0,0 |
| 78  | D | 0,0 | 59 | D | 0,0 | 97  | D | 0,0 | 20 | D  | 0,0 | 54  | D | 0,0 |
| 79  | K | 0,0 | 60 | K | 0,0 | 98  | K | 0,0 | 21 | K  | 0,0 | 55  | K | 0,0 |
| 80  | R | 0,0 | 61 | R | 0,0 | 99  | R | 0,0 | 22 | R  | 0,0 | 56  | R | 0,0 |
| 81  | Q | 0,0 | 62 | Q | 0,0 | 100 | Q | 0,0 | 23 | Q  | 0,0 | 57  | Q | 0,0 |
| 82  | R | 0,0 | 63 | R | 0,0 | 101 | R | 0,0 | 24 | R  | 0,0 | 58  | R | 0,0 |
| 83  | N | 0,0 | 64 | N | 0,0 | 102 | N | 0,0 | 25 | N  | 0,0 | 59  | N | 0,0 |
| 84  | R | 0,0 | 65 | R | 0,0 | 103 | R | 0,0 | 26 | R  | 0,0 | 60  | R | 0,0 |
| 85  | C | 0,0 | 66 | C | 0,0 | 104 | C | 0,0 | 27 | C  | 0,0 | 61  | C | 0,0 |
| 86  | Q | 0,0 | 67 | Q | 0,0 | 105 | Q | 0,0 | 28 | Q  | 0,0 | 62  | Q | 0,0 |
| 87  | Y | 0,0 | 68 | Y | 0,0 | 106 | Y | 0,0 | 29 | Y  | 0,0 | 63  | Y | 0,0 |
| 88  | C | 0,0 | 69 | C | 0,0 | 107 | C | 0,0 | 30 | C  | 0,0 | 64  | C | 0,0 |
| 89  | R | 0,0 | 70 | R | 0,0 | 108 | R | 0,0 | 31 | R  | 0,0 | 65  | R | 0,0 |
| 90  | Y | 0,0 | 71 | Y | 0,0 | 109 | Y | 0,0 | 32 | Y  | 0,0 | 66  | Y | 0,0 |
| 91  | Q | 0,0 | 72 | Q | 0,0 | 110 | Q | 0,0 | 33 | Q  | 0,1 | 67  | Q | 0,0 |
| 92  | K | 0,0 | 73 | K | 0,0 | 111 | K | 0,0 | 34 | K  | 0,0 | 68  | K | 0,0 |
| 93  | C | 0,0 | 74 | C | 0,0 | 112 | C | 0,0 | 35 | C  | 0,0 | 69  | C | 0,0 |
| 94  | L | 0,0 | 75 | L | 0,0 | 113 | L | 0,0 | 36 | L  | 0,0 | 70  | L | 0,0 |
| 95  | T | 0,1 | 76 | T | 0,1 | 114 | A | 0,0 | 37 | N  | 0,1 | 71  | S | 0,0 |
| 96  | C | 0,0 | 77 | C | 0,0 | 115 | C | 0,0 | 38 | M  | 0,0 | 72  | M | 0,0 |
| 97  | G | 0,0 | 78 | G | 0,0 | 116 | G | 0,0 | 39 | G  | 0,0 | 73  | G | 0,0 |
| 98  | M | 0,0 | 79 | M | 0,0 | 117 | M | 0,0 | 40 | M  | 0,0 | 74  | M | 0,0 |
| 99  | K | 0,0 | 80 | K | 0,0 | 118 | K | 0,0 | 41 | K  | 0,0 | 75  | K | 0,0 |
| 100 | R | 0,0 | 81 | R | 0,0 | 119 | R | 0,0 | 42 | R  | 0,0 | 76  | R | 0,0 |
| 101 | E | 0,0 | 82 | E | 0,0 | 120 | E | 0,0 | 43 | E  | 0,0 | 77  | E | 0,0 |
| 102 | A | 0,0 | 83 | A | 0,0 | 121 | A | 0,0 | 44 | A  | 0,0 | 78  | A | 0,0 |

DBD Zinc-finger 1

DBD Zinc-finger 2

|     |   |     |     |   |     |     |   |     |    |   |     |     |   |          |           |
|-----|---|-----|-----|---|-----|-----|---|-----|----|---|-----|-----|---|----------|-----------|
| 103 | V | 0,0 | 84  | V | 0,0 | 122 | V | 0,0 | 45 | V | 0,0 | 79  | V | 0,0      | DBD T-box |
| 104 | Q | 0,0 | 85  | Q | 0,0 | 123 | Q | 0,0 | 46 | Q | 0,0 | 80  | Q | 0,0      |           |
| 105 | E | 0,0 | 86  | E | 0,0 | 124 | E | 0,0 | 47 | E | 0,0 | 81  | E | 0,0      |           |
| 106 | E | 0,0 | 87  | E | 0,0 | 125 | E | 0,0 | 48 | E | 0,0 | 82  | E | 0,0      |           |
| 107 | R | 0,0 | 88  | R | 0,0 | 126 | R | 0,0 | 49 | R | 0,0 | 83  | R | 0,0      |           |
| 108 | Q | 0,0 | 89  | Q | 0,0 | 127 | Q | 0,0 | 50 | Q | 0,0 | 84  | Q | 0,0      |           |
| 109 | R | 0,0 | 90  | R | 0,0 | 128 | R | 0,0 | 51 | R | 0,0 | 85  | R | 0,0      |           |
| 110 | G | 0,0 | 91  | G | 0,0 | 129 | A | 0,2 | 52 | T | 0,0 | 86  | T | 0,0      |           |
| 111 | A | 0,0 | 92  | A | 0,1 | 130 | A | 0,0 | 53 | K | 0,0 | 87  | K | 0,0      |           |
| 112 | R | 0,0 | 93  | R | 0,0 | 131 | R | 0,0 | 54 | D | 0,0 | 88  | E | 0,0      |           |
| 113 | N | 0,2 |     |   |     |     |   |     | 55 | R | 0,0 | 89  | R | 0,0      |           |
| 114 | A | 0,1 |     |   |     |     |   |     |    |   |     |     |   | D domain |           |
| 115 | A | 0,1 |     |   |     |     |   |     |    |   |     |     |   |          |           |
| 116 | G | 0,0 |     |   |     |     |   |     |    |   |     |     |   |          |           |
| 117 | R | 0,0 |     |   |     |     |   |     |    |   |     |     |   |          |           |
| 118 | L | 0,1 |     |   |     |     |   |     |    |   |     |     |   |          |           |
| 119 | A | 0,2 |     |   |     |     |   |     |    |   |     |     |   |          |           |
|     |   |     |     |   |     | 132 | G | 0,1 | 56 | D | 0,0 | 90  | D |          | 0,0       |
|     |   |     |     |   |     | 133 | T | 0,1 | 57 | T | 0,0 | 91  | Q |          | 0,0       |
| 120 | D | 0,0 | 94  | D | 0,0 | 134 | E | 0,0 | 58 | S | 0,0 | 92  | N |          | 0,0       |
| 121 | D | 0,1 | 95  | D | 0,1 | 135 | D | 0,0 | 59 | E | 0,0 | 93  | E |          | 0,0       |
| 122 | F | 0,0 | 96  | F | 0,0 | 136 | A | 0,1 | 60 | V | 0,0 | 94  | V | 0,0      |           |
| 123 | M | 0,1 | 97  | M | 0,1 | 137 | H | 0,1 | 61 | E | 0,0 | 95  | E | 0,0      |           |
| 124 | T | 0,1 | 98  | T | 0,1 | 138 | P | 0,0 | 62 | S | 0,0 | 96  | S | 0,0      |           |
| 125 | N | 0,1 | 99  | N | 0,1 | 139 | S | 0,0 | 63 | T | 0,0 | 97  | T | 0,0      |           |
| 126 | S | 0,1 | 100 | S | 0,1 | 140 | S | 0,0 | 64 | S | 0,0 | 98  | S | 0,0      |           |
| 127 | V | 0,0 | 101 | V | 0,1 | 141 | S | 0,0 | 65 | N | 0,0 | 99  | S | 0,0      |           |
| 128 | S | 0,0 | 102 | S | 0,1 | 142 | V | 0,0 | 66 | L | 0,1 | 100 | L | 0,0      |           |
|     |   |     |     |   |     | 143 | Q | 0,0 | 67 | Q | 0,0 | 101 | H | 0,0      |           |
|     |   |     |     |   |     |     |   |     | 68 | A | 0,0 | 102 | T | 0,0      |           |
| 129 | R | 0,0 | 103 | R | 0,0 |     |   |     |    |   |     |     |   |          |           |
| 130 | D | 0,0 | 104 | D | 0,0 | 144 | E | 0,0 | 69 | D | 0,0 | 103 | D | 0,0      |           |
| 131 | F | 0,1 | 105 | F | 0,1 | 145 | L | 0,0 | 70 | M | 0,0 | 104 | M | 0,0      |           |
| 132 | S | 0,1 | 106 | S | 0,1 | 146 | S | 0,0 | 71 | P | 0,0 | 105 | P | 0,0      |           |
| 133 | I | 0,0 | 107 | I | 0,0 | 147 | I | 0,0 | 72 | L | 0,0 | 106 | V | 0,0      |           |
| 134 | E | 0,0 | 108 | E | 0,0 | 148 | E | 0,0 | 73 | E | 0,0 | 107 | E | 0,0      |           |
| 135 | R | 0,0 | 109 | R | 0,0 | 149 | R | 0,0 | 74 | R | 0,0 | 108 | R | 0,0      |           |
| 136 | I | 0,1 | 110 | I | 0,1 | 150 | L | 0,0 | 75 | I | 0,0 | 109 | I | 0,0      |           |
| 137 | I | 0,2 | 111 | I | 0,9 | 151 | L | 0,2 | 76 | I | 0,0 | 110 | L | 0,0      |           |
| 138 | E | 0,1 | 112 | E | 0,1 | 152 | E | 0,0 | 77 | E | 0,0 | 111 | E | 0,0      |           |
| 139 | A | 0,0 | 113 | A | 0,0 | 153 | M | 0,1 | 78 | A | 0,0 | 112 | A | 0,0      |           |
| 140 | E | 0,0 | 114 | E | 0,0 | 154 | E | 0,0 | 79 | E | 0,0 | 113 | E | 0,0      |           |
|     |   |     |     |   |     |     |   |     |    |   |     |     |   | LBD H1   |           |
| 141 | Q | 0,0 | 115 | Q | 0,0 |     |   |     | 80 | K | 0,0 | 114 | K |          | 0,0       |
| 142 | R | 0,0 | 116 | R | 0,1 |     |   |     | 81 | R | 0,0 | 115 | R |          | 0,0       |
| 143 | A | 0,0 | 117 | A | 0,1 |     |   |     | 82 | V | 0,0 | 116 | V |          | 0,0       |
| 144 | E | 0,0 | 118 | E | 0,0 |     |   |     | 83 | E | 0,0 | 117 | E |          | 0,0       |
| 145 | T | 0,2 | 119 | T | 0,1 |     |   |     | 84 | C | 0,0 | 118 | C |          | 0,0       |
| 146 | Q | 0,2 | 120 | Q | 0,2 |     |   |     | 85 | N | 0,0 | 119 | K |          | 0,0       |
|     |   |     |     |   |     |     |   |     | 86 | D | 0,0 |     |   |          |           |
|     |   |     |     |   |     | 155 | S | 0,2 | 87 | P | 0,0 |     |   |          |           |
|     |   |     |     |   |     | 156 | L | 0,0 | 88 | L | 0,0 |     |   |          |           |
|     |   |     |     |   |     | 157 | V | 0,0 | 89 | V | 0,0 |     |   |          |           |
|     |   |     |     |   |     | 158 | A | 0,0 | 90 | A | 0,0 |     |   |          |           |
|     |   |     |     |   |     |     |   |     |    |   |     | 120 | S | 0,2      |           |
|     |   |     |     |   |     |     |   |     |    |   |     | 121 | E | 0,0      |           |
|     |   |     |     |   |     |     |   |     |    |   |     | 122 | Q | 0,1      |           |
|     |   |     |     |   |     |     |   |     |    |   |     | 123 | Q | 0,0      |           |
|     |   |     |     |   |     |     |   |     |    |   |     | 124 | V | 0,0      |           |
|     |   |     |     |   |     |     |   |     |    |   |     | 125 | E | 0,0      |           |
|     |   |     |     |   |     |     |   |     |    |   |     | 126 | F | 0,0      |           |
|     |   |     |     |   |     |     |   |     |    |   |     | 127 | E | 0,0      |           |
|     |   |     |     |   |     |     |   |     |    |   |     | 128 | S | 0,0      |           |
|     |   |     |     |   |     |     |   |     |    |   |     | 129 | A | 0,0      |           |
|     |   |     |     |   |     | 159 | D | 0,0 |    |   |     |     |   |          |           |
|     |   |     |     |   |     | 160 | P | 0,2 |    |   |     |     |   |          |           |
|     |   |     |     |   |     | 161 | S | 0,3 |    |   |     |     |   |          |           |



|     |          |     |     |          |     |     |          |     |     |          |     |     |          |     |
|-----|----------|-----|-----|----------|-----|-----|----------|-----|-----|----------|-----|-----|----------|-----|
| 204 | V        | 0,0 | 178 | V        | 0,1 | 216 | I        | 0,2 | 132 | V        | 0,0 | 163 | V        | 0,0 |
| 205 | I        | 0,0 | 179 | I        | 0,1 | 217 | L        | 0,3 | 133 | Q        | 0,1 | 164 | L        | 0,0 |
| 206 | L        | 0,0 | 180 | L        | 0,0 | 218 | L        | 0,0 | 134 | L        | 0,0 | 165 | L        | 0,0 |
| 207 | L        | 0,0 | 181 | L        | 0,0 | 219 | I        | 0,0 | 135 | L        | 0,0 | 166 | L        | 0,0 |
| 208 | K        | 0,0 | 182 | K        | 0,0 | 220 | K        | 0,0 | 136 | R        | 0,0 | 167 | R        | 0,0 |
| 209 | A        | 0,0 | 183 | A        | 0,1 | 221 | G        | 0,3 | 137 | A        | 0,0 | 168 | A        | 0,0 |
| 210 | A        | 0,1 | 184 | A        | 0,1 | 222 | S        | 0,1 | 138 | G        | 0,0 | 169 | G        | 0,0 |
| 211 | W        | 0,0 | 185 | W        | 0,0 | 223 | W        | 0,0 | 139 | W        | 0,0 | 170 | W        | 0,0 |
| 212 | I        | 0,1 | 186 | I        | 0,0 | 224 | N        | 0,0 | 140 | N        | 0,0 | 171 | N        | 0,0 |
| 213 | E        | 0,0 | 187 | E        | 0,0 | 225 | E        | 0,0 | 141 | E        | 0,0 | 172 | E        | 0,0 |
| 214 | L        | 0,0 | 188 | L        | 0,0 | 226 | L        | 0,0 | 142 | L        | 0,0 | 173 | L        | 0,0 |
| 215 | L        | 0,0 | 189 | L        | 0,0 | 227 | L        | 0,0 | 143 | L        | 0,0 | 174 | L        | 0,0 |
| 216 | I        | 0,0 | 190 | I        | 0,0 | 228 | L        | 0,0 | 144 | I        | 0,0 | 175 | I        | 0,0 |
| 217 | A        | 0,0 | 191 | A        | 0,0 | 229 | F        | 0,0 | 145 | A        | 0,0 | 176 | A        | 0,0 |
| 218 | N        | 0,0 | 192 | N        | 0,1 | 230 | A        | 0,0 | 146 | A        | 0,0 | 177 | A        | 0,0 |
| 219 | V        | 0,0 | 193 | V        | 0,0 | 231 | I        | 0,0 | 147 | F        | 0,0 | 178 | F        | 0,0 |
| 220 | A        | 0,0 | 194 | A        | 0,0 | 232 | A        | 0,0 | 148 | S        | 0,0 | 179 | S        | 0,0 |
| 221 | W        | 0,0 | 195 | W        | 0,0 | 233 | W        | 0,0 | 149 | H        | 0,0 | 180 | H        | 0,0 |
| 222 | C        | 0,1 | 196 | C        | 0,1 | 234 | R        | 0,0 | 150 | R        | 0,0 | 181 | R        | 0,0 |
| 223 | S        | 0,0 | 197 | S        | 0,0 | 235 | S        | 0,0 | 151 | S        | 0,0 | 182 | S        | 0,0 |
| 224 | I        | 0,0 | 198 | I        | 0,0 | 236 | M        | 0,0 | 152 | M        | 0,0 | 183 | V        | 0,0 |
|     |          |     |     |          |     |     |          |     |     |          |     | 184 | E        | 0,0 |
|     |          |     |     |          |     |     |          |     |     |          |     | 185 | V        | 0,0 |
|     |          |     |     |          |     |     |          |     |     |          |     | 186 | K        | 0,0 |
|     |          |     |     |          |     |     |          |     | 153 | Q        | 0,0 |     |          |     |
|     |          |     |     |          |     |     |          |     | 154 | A        | 0,0 |     |          |     |
|     |          |     |     |          |     |     |          |     | 155 | Q        | 0,0 |     |          |     |
| 225 | V        | 0,1 | 199 | V        | 0,1 | 237 | E        | 0,0 |     |          |     |     |          |     |
| 226 | S        | 0,0 | 200 | S        | 0,0 | 238 | F        | 0,3 |     |          |     |     |          |     |
| 227 | L        | 0,1 | 201 | L        | 0,1 | 239 | L        | 0,0 |     |          |     |     |          |     |
| 228 | <i>D</i> | 0,0 | 202 | <i>D</i> | 0,0 | 240 | <i>T</i> | 0,3 |     |          |     |     |          |     |
| 229 | <i>D</i> | 0,1 | 203 | <i>D</i> | 0,1 | 241 | <i>E</i> | 0,1 |     |          |     |     |          |     |
|     |          |     |     |          |     | 242 | <i>E</i> | 0,0 |     |          |     |     |          |     |
|     |          |     |     |          |     | 243 | <i>R</i> | 0,0 |     |          |     |     |          |     |
|     |          |     |     |          |     | 244 | <i>D</i> | 0,2 |     |          |     |     |          |     |
|     |          |     |     |          |     | 245 | <i>G</i> | 0,2 |     |          |     |     |          |     |
|     |          |     |     |          |     | 246 | <i>V</i> | 0,2 |     |          |     |     |          |     |
| 230 | <i>G</i> | 0,0 |     |          |     |     |          |     |     |          |     |     |          |     |
| 231 | <i>L</i> | 0,2 |     |          |     |     |          |     |     |          |     |     |          |     |
| 232 | <i>G</i> | 0,1 |     |          |     |     |          |     |     |          |     |     |          |     |
| 233 | <i>H</i> | 0,0 |     |          |     |     |          |     |     |          |     |     |          |     |
| 234 | <i>D</i> | 0,0 |     |          |     | 247 | <i>D</i> | 0,0 |     |          |     |     |          |     |
| 235 | <i>G</i> | 0,1 |     |          |     |     |          |     |     |          |     |     |          |     |
| 236 | <i>S</i> | 0,1 |     |          |     | 248 | <i>T</i> | 0,2 |     |          |     |     |          |     |
| 237 | <i>F</i> | 0,0 |     |          |     |     |          |     |     |          |     |     |          |     |
| 238 | <i>E</i> | 0,1 |     |          |     |     |          |     |     |          |     |     |          |     |
| 239 | <i>R</i> | 0,0 |     |          |     |     |          |     |     |          |     |     |          |     |
| 240 | <i>R</i> | 0,0 |     |          |     |     |          |     |     |          |     |     |          |     |
|     |          |     |     |          |     | 249 | <i>R</i> | 0,0 |     |          |     |     |          |     |
|     |          |     |     |          |     | 250 | <i>T</i> | 0,2 |     |          |     |     |          |     |
|     |          |     |     |          |     | 251 | <i>T</i> | 0,0 |     |          |     |     |          |     |
|     |          |     |     |          |     | 252 | <i>S</i> | 0,2 |     |          |     |     |          |     |
|     |          |     |     |          |     | 253 | <i>P</i> | 0,1 |     |          |     |     |          |     |
| 241 | <i>S</i> | 0,0 | 204 | <i>S</i> | 0,1 |     |          |     |     |          |     |     |          |     |
| 242 | <i>P</i> | 0,0 | 205 | <i>P</i> | 0,1 |     |          |     |     |          |     |     |          |     |
| 243 | <i>G</i> | 0,1 | 206 | <i>G</i> | 0,1 |     |          |     |     |          |     |     |          |     |
| 244 | <i>L</i> | 0,1 | 207 | <i>L</i> | 0,1 |     |          |     |     |          |     |     |          |     |
| 245 | <i>Q</i> | 0,0 | 208 | <i>Q</i> | 0,0 |     |          |     |     |          |     |     |          |     |
| 246 | <i>P</i> | 0,0 | 209 | <i>P</i> | 0,0 | 254 | <i>P</i> | 0,0 |     |          |     |     |          |     |
| 247 | <i>Q</i> | 0,0 | 210 | <i>Q</i> | 0,0 | 255 | <i>Q</i> | 0,0 |     |          |     |     |          |     |
| 248 | <i>Q</i> | 0,0 | 211 | <i>Q</i> | 0,0 | 256 | <i>L</i> | 0,0 |     |          |     |     |          |     |
| 249 | <i>L</i> | 0,0 | 212 | <i>L</i> | 0,0 | 257 | <i>M</i> | 0,1 |     |          |     |     |          |     |
| 250 | <i>F</i> | 0,0 | 213 | <i>F</i> | 0,0 | 258 | <i>C</i> | 0,0 |     |          |     |     |          |     |
|     |          |     |     |          |     |     |          |     | 156 | <i>D</i> | 0,0 | 187 | <i>D</i> | 0,0 |
|     |          |     |     |          |     |     |          |     | 157 | <i>A</i> | 0,0 | 188 | <i>G</i> | 0,0 |
|     |          |     |     |          |     |     |          |     | 158 | <i>I</i> | 0,0 | 189 | <i>I</i> | 0,0 |
|     |          |     |     |          |     |     |          |     | 159 | <i>V</i> | 0,0 | 190 | <i>V</i> | 0,0 |
| 251 | <i>L</i> | 0,0 | 214 | <i>L</i> | 0,0 | 259 | <i>L</i> | 0,0 | 160 | <i>L</i> | 0,0 | 191 | <i>L</i> | 0,0 |
| 252 | <i>N</i> | 0,1 | 215 | <i>N</i> | 0,1 | 260 | <i>M</i> | 0,0 | 161 | <i>A</i> | 0,0 | 192 | <i>A</i> | 0,0 |
| 253 | <i>Q</i> | 0,0 | 216 | <i>Q</i> | 0,0 | 261 | <i>P</i> | 0,0 | 162 | <i>T</i> | 0,0 | 193 | <i>T</i> | 0,0 |
| 254 | <i>S</i> | 0,1 | 217 | <i>S</i> | 0,0 | 262 | <i>G</i> | 0,0 | 163 | <i>G</i> | 0,0 | 194 | <i>G</i> | 0,0 |

LBD H4-H5

residues in italics and boxed:  
not stabilised in the crystals

β-s1

|     |   |     |     |   |     |     |   |     |     |   |     |     |   |     |      |
|-----|---|-----|-----|---|-----|-----|---|-----|-----|---|-----|-----|---|-----|------|
| 255 | F | 0,0 | 218 | F | 0,0 | 263 | M | 0,0 | 164 | L | 0,0 | 195 | L | 0,0 | β-s2 |
| 256 | S | 0,0 | 219 | S | 0,0 | 264 | T | 0,0 | 165 | T | 0,0 | 196 | T | 0,0 |      |
| 257 | Y | 0,0 | 220 | Y | 0,1 | 265 | L | 0,0 | 166 | V | 0,0 | 197 | V | 0,0 |      |
| 258 | H | 0,0 | 221 | H | 0,0 | 266 | H | 0,0 | 167 | N | 0,0 | 198 | H | 0,0 |      |
| 259 | R | 0,0 | 222 | R | 0,0 | 267 | R | 0,0 | 168 | K | 0,0 | 199 | R | 0,0 |      |
| 260 | N | 0,0 | 223 | N | 0,0 | 268 | N | 0,0 | 169 | S | 0,1 | 200 | N | 0,0 |      |
| 261 | S | 0,0 | 224 | S | 0,0 | 269 | S | 0,0 | 170 | T | 0,0 | 201 | S | 0,0 |      |
| 262 | A | 0,0 | 225 | A | 0,0 | 270 | A | 0,0 | 171 | A | 0,0 | 202 | A | 0,0 |      |
| 263 | I | 0,1 | 226 | I | 0,1 | 271 | L | 0,1 | 172 | H | 0,1 | 203 | H | 0,0 |      |
| 264 | K | 0,0 | 227 | K | 0,0 | 272 | Q | 0,0 | 173 | A | 0,0 | 204 | Q | 0,0 |      |
| 265 | A | 0,0 | 228 | A | 0,0 | 273 | A | 0,0 | 174 | V | 0,0 | 205 | A | 0,0 |      |
| 266 | G | 0,0 | 229 | G | 0,1 | 274 | G | 0,0 | 175 | G | 0,0 | 206 | G | 0,0 |      |
| 267 | V | 0,0 | 230 | V | 0,0 | 275 | V | 0,0 | 176 | V | 0,0 | 207 | V | 0,0 |      |
| 268 | S | 0,1 | 231 | S | 0,1 | 276 | G | 0,0 | 177 | G | 0,0 | 208 | G | 0,0 |      |
| 269 | A | 0,2 | 232 | A | 0,1 | 277 | Q | 0,2 | 178 | N | 0,0 | 209 | A | 0,1 |      |
| 270 | I | 0,0 | 233 | I | 0,0 | 278 | I | 0,0 | 179 | I | 0,0 | 210 | I | 0,0 |      |
| 271 | F | 0,0 | 234 | F | 0,0 | 279 | F | 0,0 | 180 | Y | 0,0 | 211 | F | 0,0 |      |
| 272 | D | 0,0 | 235 | D | 0,0 | 280 | D | 0,0 | 181 | D | 0,0 | 212 | D | 0,0 |      |
| 273 | R | 0,0 | 236 | R | 0,0 | 281 | R | 0,0 | 182 | R | 0,0 | 213 | R | 0,0 |      |
| 274 | I | 0,0 | 237 | I | 0,0 | 282 | V | 0,0 | 183 | V | 0,0 | 214 | V | 0,0 |      |
| 275 | L | 0,0 | 238 | L | 0,0 | 283 | L | 0,0 | 184 | L | 0,0 | 215 | L | 0,0 |      |
| 276 | S | 0,0 | 239 | S | 0,0 | 284 | S | 0,0 | 185 | S | 0,0 | 216 | T | 0,0 |      |
| 277 | E | 0,0 | 240 | E | 0,0 | 285 | E | 0,0 | 186 | E | 0,0 | 217 | E | 0,0 |      |
| 278 | L | 0,0 | 241 | L | 0,0 | 286 | L | 0,0 | 187 | L | 0,0 | 218 | L | 0,0 |      |
| 279 | S | 0,0 | 242 | S | 0,0 | 287 | S | 0,3 | 188 | V | 0,0 | 219 | V | 0,0 |      |
| 280 | V | 0,0 | 243 | V | 0,0 | 288 | L | 0,0 | 189 | N | 0,0 | 220 | A | 0,0 |      |
| 281 | K | 0,0 | 244 | K | 0,0 | 289 | K | 0,0 | 190 | K | 0,0 | 221 | K | 0,0 |      |
| 282 | M | 0,0 | 245 | M | 0,0 | 290 | M | 0,0 | 191 | M | 0,0 | 222 | M | 0,0 |      |
| 283 | K | 0,0 | 246 | K | 0,0 | 291 | R | 0,0 | 192 | K | 0,0 | 223 | R | 0,0 |      |
| 284 | R | 0,1 | 247 | R | 0,0 | 292 | T | 0,3 | 193 | E | 0,0 | 224 | E | 0,0 |      |
| 285 | L | 0,0 | 248 | L | 0,0 | 293 | L | 0,0 | 194 | M | 0,0 | 225 | M | 0,0 |      |
| 286 | N | 0,0 | 249 | N | 0,0 | 294 | R | 0,1 | 195 | K | 0,0 | 226 | K | 0,0 |      |
| 287 | L | 0,0 | 250 | L | 0,1 | 295 | V | 0,2 | 196 | M | 0,0 | 227 | M | 0,0 |      |
| 288 | D | 0,0 | 251 | D | 0,0 | 296 | D | 0,0 | 197 | D | 0,0 | 228 | D | 0,0 |      |
| 289 | R | 0,0 | 252 | R | 0,1 | 297 | Q | 0,0 | 198 | K | 0,0 | 229 | K | 0,0 |      |
| 290 | R | 0,1 | 253 | R | 0,1 | 298 | A | 0,0 | 199 | T | 0,0 | 230 | T | 0,0 |      |
| 291 | E | 0,0 | 254 | E | 0,0 | 299 | E | 0,0 | 200 | E | 0,0 | 231 | E | 0,0 |      |
| 292 | L | 0,0 | 255 | L | 0,0 | 300 | Y | 0,1 | 201 | L | 0,0 | 232 | L | 0,0 |      |
| 293 | S | 0,2 | 256 | S | 0,1 | 301 | V | 0,0 | 202 | G | 0,0 | 233 | G | 0,0 |      |
| 294 | C | 0,0 | 257 | C | 0,1 | 302 | A | 0,0 | 203 | C | 0,0 | 234 | C | 0,0 |      |
| 295 | L | 0,0 | 258 | L | 0,0 | 303 | L | 0,0 | 204 | L | 0,0 | 235 | L | 0,0 |      |
| 296 | K | 0,0 | 259 | K | 0,0 | 304 | K | 0,0 | 205 | R | 0,0 | 236 | R | 0,0 |      |
| 297 | A | 0,0 | 260 | A | 0,0 | 305 | A | 0,0 | 206 | A | 0,0 | 237 | S | 0,0 |      |
| 298 | I | 0,0 | 261 | I | 0,0 | 306 | I | 0,1 | 207 | I | 0,0 | 238 | V | 0,0 |      |
| 299 | I | 0,0 | 262 | I | 0,0 | 307 | I | 0,1 | 208 | I | 0,0 | 239 | I | 0,0 |      |
| 300 | L | 0,0 | 263 | L | 0,0 | 308 | L | 0,0 | 209 | L | 0,0 | 240 | L | 0,0 |      |
| 301 | Y | 0,0 | 264 | Y | 0,0 | 309 | L | 0,0 | 210 | Y | 0,0 | 241 | F | 0,0 |      |
| 302 | N | 0,0 | 265 | N | 0,0 | 310 | N | 0,0 | 211 | N | 0,0 | 242 | N | 0,0 |      |
| 303 | P | 0,1 | 266 | P | 0,0 | 311 | P | 0,0 | 212 | P | 0,0 | 243 | P | 0,0 |      |
| 304 | D | 0,0 | 267 | D | 0,0 | 312 | D | 0,0 | 213 | D | 0,0 | 244 | D | 0,0 |      |
| 305 | I | 0,1 | 268 | I | 0,0 | 313 | V | 0,1 | 214 | V | 0,0 | 245 | V | 0,0 |      |
| 306 | R | 0,0 | 269 | R | 0,0 | 314 | K | 0,0 | 215 | R | 0,0 | 246 | R | 0,0 |      |
| 307 | G | 0,0 | 270 | G | 0,0 | 315 | G | 0,0 | 216 | G | 0,0 | 247 | G | 0,0 |      |
| 308 | I | 0,0 | 271 | I | 0,0 | 316 | L | 0,0 | 217 | I | 0,0 | 248 | L | 0,0 |      |
| 309 | K | 0,0 | 272 | K | 0,0 | 317 | K | 0,2 | 218 | K | 0,0 | 249 | K | 0,0 |      |
| 310 | S | 0,1 | 273 | S | 0,1 | 318 | N | 0,1 | 219 | S | 0,0 | 250 | S | 0,0 |      |
| 311 | R | 0,0 | 274 | R | 0,0 | 319 | R | 0,1 | 220 | V | 0,0 | 251 | S | 1,0 |      |
| 312 | A | 0,1 | 275 | A | 0,1 | 320 | Q | 0,1 | 221 | Q | 0,0 | 252 | Q | 0,2 |      |
| 313 | E | 0,1 | 276 | E | 0,1 | 321 | E | 0,0 | 222 | E | 0,0 | 253 | E | 0,1 |      |
| 314 | I | 0,0 | 277 | I | 0,1 | 322 | V | 0,0 | 223 | V | 0,0 | 254 | V | 0,0 |      |
| 315 | E | 0,0 | 278 | E | 0,0 | 323 | E | 0,2 | 224 | E | 0,0 | 255 | E | 0,0 |      |
| 316 | M | 0,1 | 279 | M | 0,2 | 324 | V | 0,0 | 225 | M | 0,0 | 256 | L | 1,0 |      |
| 317 | C | 0,0 | 280 | C | 0,1 | 325 | L | 0,0 | 226 | L | 0,0 | 257 | L | 0,0 |      |
| 318 | R | 0,0 | 281 | R | 0,0 | 326 | R | 0,0 | 227 | R | 0,0 | 258 | R | 0,0 |      |
| 319 | E | 0,0 | 282 | E | 0,0 | 327 | E | 0,0 | 228 | E | 0,0 | 259 | E | 0,0 |      |
| 320 | K | 0,0 | 283 | K | 0,0 | 328 | K | 0,0 | 229 | K | 0,0 | 260 | K | 0,0 |      |
| 321 | V | 0,0 | 284 | V | 0,0 | 329 | M | 0,0 | 230 | I | 0,0 | 261 | V | 0,0 |      |
| 322 | Y | 0,0 | 285 | Y | 0,0 | 330 | F | 0,1 | 231 | Y | 0,0 | 262 | Y | 0,0 |      |

LBD H6-H7

LBD H8

LBD H9

|           |           |           |           |           |
|-----------|-----------|-----------|-----------|-----------|
| 323 A 0,0 | 286 A 0,0 | 331 L 0,2 | 232 G 0,0 | 263 A 0,0 |
| 324 C 0,0 | 287 C 0,0 | 332 C 0,0 | 233 V 0,0 | 264 A 0,0 |
| 325 L 0,0 | 288 L 0,0 | 333 L 0,0 | 234 L 0,0 | 265 L 0,0 |
| 326 D 0,0 | 289 D 0,0 | 334 D 0,0 | 235 E 0,0 | 266 E 0,0 |
| 327 E 0,0 | 290 E 0,0 | 335 E 0,1 | 236 E 0,0 | 267 E 0,0 |
| 328 H 0,0 | 291 H 0,0 | 336 Y 0,0 | 237 Y 0,0 | 268 Y 0,0 |
| 329 C 0,0 | 292 C 0,0 | 337 C 0,2 | 238 T 0,0 | 269 T 0,0 |
| 330 R 0,0 | 293 R 0,0 | 338 R 0,0 | 239 R 0,0 | 270 R 0,0 |
| 331 L 0,2 | 294 L 0,9 | 339 R 0,0 | 240 T 0,0 | 271 T 0,0 |
| 332 E 0,0 | 295 E 0,0 | 340 S 0,2 | 241 T 0,0 | 272 T 0,0 |
| 333 H 0,0 | 296 H 0,0 | 341 R 0,0 | 242 H 0,0 | 273 Y 0,0 |
| 334 P 0,0 | 297 P 0,0 | 342 S 0,3 | 243 P 0,0 | 274 P 0,0 |
| 335 G 0,0 | 298 G 0,1 | 343 S 0,3 | 244 N 0,0 | 275 D 0,0 |
| 336 D 0,0 | 299 D 0,0 | 344 E 0,0 | 245 E 0,0 | 276 E 0,0 |
| 337 D 0,0 | 300 D 0,0 | 345 E 0,0 | 246 P 0,0 | 277 P 0,0 |
| 338 G 0,0 | 301 G 0,0 | 346 G 0,0 | 247 G 0,0 | 278 G 0,0 |
| 339 R 0,0 | 302 R 0,0 | 347 R 0,0 | 248 R 0,0 | 279 R 0,0 |
| 340 F 0,0 | 303 F 0,0 | 348 F 0,0 | 249 F 0,0 |           |
| 341 A 0,0 | 304 A 0,0 | 349 A 0,0 | 250 A 0,0 |           |
| 342 Q 0,0 | 305 Q 0,0 | 350 A 0,2 | 251 K 0,0 |           |
| 343 L 0,0 | 306 L 0,0 | 351 L 0,0 | 252 L 0,0 |           |
| 344 L 0,0 | 307 L 0,0 | 352 L 0,0 | 253 L 0,0 |           |
| 345 L 0,0 | 308 L 0,0 | 353 L 0,0 | 254 L 0,0 |           |
| 346 R 0,0 | 309 R 0,0 | 354 R 0,0 | 255 R 0,0 |           |
| 347 L 0,0 | 310 L 0,0 | 355 L 0,0 | 256 L 0,0 |           |
| 348 P 0,0 | 311 P 0,0 | 356 P 0,0 | 257 P 0,0 |           |
| 349 A 0,0 | 312 A 0,0 | 357 A 0,0 | 258 A 0,0 |           |
| 350 L 0,0 | 313 L 0,0 | 358 L 0,0 | 259 L 0,0 |           |
| 351 R 0,0 | 314 R 0,0 | 359 R 0,0 | 260 R 0,0 |           |
| 352 S 0,0 | 315 S 0,0 | 360 S 0,0 | 261 S 0,0 |           |
| 353 I 0,0 | 316 I 0,0 | 361 I 0,0 | 262 I 0,0 |           |
| 354 S 0,0 | 317 S 0,0 | 362 S 0,0 | 263 G 0,0 |           |
| 355 L 0,0 | 318 L 0,0 | 363 L 0,0 | 264 L 0,0 |           |
| 356 K 0,0 | 319 K 0,0 | 364 K 0,0 | 265 K 0,0 |           |
| 357 C 0,0 | 320 C 0,0 | 365 S 0,1 | 266 C 0,0 |           |
| 358 Q 0,1 | 321 Q 0,1 | 366 F 0,0 | 267 L 0,0 |           |
| 359 D 0,0 | 322 D 0,0 | 367 E 0,0 | 268 E 0,0 |           |
| 360 H 0,0 | 323 H 0,0 | 368 H 0,0 | 269 H 0,0 |           |
| 361 L 0,1 | 324 L 0,0 | 369 L 0,0 | 270 L 0,0 |           |
| 362 F 0,0 | 325 F 0,0 | 370 F 0,1 | 271 F 0,0 |           |
| 363 L 0,1 | 326 L 0,0 | 371 F 0,1 | 272 F 0,0 |           |
| 364 F 0,0 | 327 F 0,0 | 372 F 0,0 | 273 F 0,0 |           |
| 365 R 0,1 | 328 R 0,0 | 373 H 0,0 | 274 K 0,0 |           |
| 366 I 0,0 | 329 I 0,0 | 374 L 0,0 | 275 L 0,0 |           |
| 367 T 0,1 | 330 T 0,1 | 375 V 0,0 | 276 I 0,0 |           |
| 368 S 0,0 | 331 S 0,1 | 376 A 0,0 | 277 G 0,0 |           |
| 369 D 0,0 | 332 D 0,0 | 377 D 0,1 | 278 D 0,0 |           |
| 370 R 0,0 | 333 R 0,0 | 378 T 0,3 | 279 V 0,0 |           |
|           |           | 379 S 0,2 |           |           |
|           |           | 380 I 0,1 |           |           |
|           |           | 381 A 0,3 |           |           |
|           |           | 382 G 0,2 |           |           |
|           |           | 383 Y 0,0 |           |           |
|           |           | 384 I 0,0 |           |           |
|           |           | 385 R 0,1 |           |           |
|           |           | 386 D 0,1 |           |           |
|           |           | 387 A 0,2 |           |           |
|           |           | 388 L 0,0 |           |           |
|           |           | 389 R 0,1 |           |           |
|           |           | 390 N 0,2 |           |           |
|           |           | 391 H 0,0 |           |           |
|           |           | 392 A 0,2 |           |           |
|           |           | 393 P 0,0 |           |           |
| 371 P 0,0 | 334 P 0,1 | 394 P 0,1 | 280 P 0,0 |           |
| 372 L 0,0 | 335 L 0,0 | 395 I 0,1 | 281 I 0,0 |           |
| 373 E 0,1 | 336 E 0,0 | 396 D 0,0 | 282 D 0,0 |           |
| 374 E 0,1 | 337 E 0,1 | 397 T 0,3 | 283 T 0,0 |           |
| 375 L 0,0 | 338 L 0,1 | 398 N 0,3 |           |           |

LBD H10-H11

|     |   |     |     |   |     |         |
|-----|---|-----|-----|---|-----|---------|
| 376 | F | 0,0 | 339 | F | 0,0 | LBD H12 |
| 377 | L | 0,1 | 340 | L | 0,1 |         |
|     |   |     | 341 | E | 0,0 |         |
|     |   |     | 342 | Q | 0,1 |         |
|     |   |     | 343 | L | 0,0 |         |
|     |   |     | 344 | E | 0,0 |         |
|     |   |     | 345 | A | 0,1 |         |
|     |   |     | 346 | P | 0,1 |         |
|     |   |     |     |   |     |         |
|     |   |     |     |   |     |         |

**Table S3.** dN/dS of usp in Drosophilidae, Diptera, Lepidoptera, Tenebrionidae and Blattidae.
