# Supplementary material for: Molecular adaptation and resilience of the insect’s nuclear receptor USP
Source: PubMed Central journal article supplement (PMC3520820; doi:10.1186/1471-2148-12-199), 2012-10-05
Supplement: 1471-2148-12-199-S3.pdf [file 1471-2148-12-199-S3.pdf]

| <b>Model</b> | <b>Drosophilidae</b>                    | <b>Diptera</b> | <b>Lepidoptera</b> | <b>Tenebrionidae</b> | <b>Blattaria</b> |
|--------------|-----------------------------------------|----------------|--------------------|----------------------|------------------|
| M1a          | $\text{Ln}L$ ( <i>np</i> ) -5649.5 (31) | -6946.6 (25)   | -4376.2 (12)       | -2113.5 (10)         | -1945.6 (13)     |
|              | $\omega_0$ [SE] 0.020 [0.002]           | 0.026 [0.003]  | 0.028 [0.003]      | 0.009 [0.003]        | 0.004 [0.002]    |
|              | $p_0$ [SE] 0.983 [0.007]                | 0.976 [0.009]  | 0.952 [0.013]      | 0.992 [0.006]        | 0.985 [0.008]    |
| M2a          | $\text{Ln}L$ ( <i>np</i> ) -5649.5 (33) | -6946.6 (27)   | -4376.2 (14)       | -2113.5 (12)         | -1945.6 (15)     |
|              | $\omega_0$ [SE] 0.020 [0.002]           | 0.026 [0.003]  | 0.028 [0.003]      | 0.009 [0.003]        | 0.004 [0.002]    |
|              | $\omega_2$ [SE] 1.000 [0.000]           | 1.000 [0.000]  | 1.000 [na]         | 1.000 [0.000]        | 1.237 [na]       |
|              | $p_0$ [SE] 0.983 [0.007]                | 0.976 [0.009]  | 0.952 [0.013]      | 0.992 [0.006]        | 0.985 [0.008]    |
|              | $p_1$ [SE] 0.011 [0.007]                | 0.010 [0.007]  | 0.029 [0.013]      | 0.005 [0.004]        | 0.006 [na]       |
| M7           | $\text{Ln}L$ ( <i>np</i> ) -5610.8 (31) | -6859.5 (25)   | -4339.9 (12)       | -2112.9 (10)         | -1950.0 (13)     |
|              | $p$ [SE] 0.159 [0.027]                  | 0.404 [0.055]  | 0.150 [0.026]      | 0.059 [0.062]        | 0.011 [0.055]    |
|              | $q$ [SE] 5.048 [0.900]                  | 10.774 [2.037] | 2.578 [0.560]      | 3.129 [4.238]        | 0.308 [2.024]    |
| M8           | $\text{Ln}L$ ( <i>np</i> ) -5610.8 (33) | -6857.1 (27)   | -4338.8 (14)       | -2112.9 (12)         | -1946 (15)       |
|              | $p$ [SE] 0.159 [0.028]                  | 0.432 [0.0621] | 0.156 [0.028]      | 0.059 [0.062]        | 0.023 [0.212]    |
|              | $q$ [SE] 5.049 [0.955]                  | 12.880 [2.824] | 2.85 [0.630]       | 3.133 [4.282]        | 2.089 [49.209]   |
|              | $\omega_s$ [SE] 1.000 [na]              | 1.000 [1.196]  | 4.457 [8.024]      | 1.000 [na]           | 1.000 [0.607]    |
|              | $p_0$ [SE] 1.000 [na]                   | 0.994 [0.007]  | 0.997 [0.003]      | 1.000 [0.000]        | 0.985 [0.009]    |

**Table S4:** Standard errors [SE] associated to the parameters of the models fitted in the likelihood analysis reported in Table 1.
