# Supplementary material for: Molecular adaptation and resilience of the insect’s nuclear receptor USP
Source: PubMed Central journal article supplement (PMC3520820; doi:10.1186/1471-2148-12-199), 2012-10-05

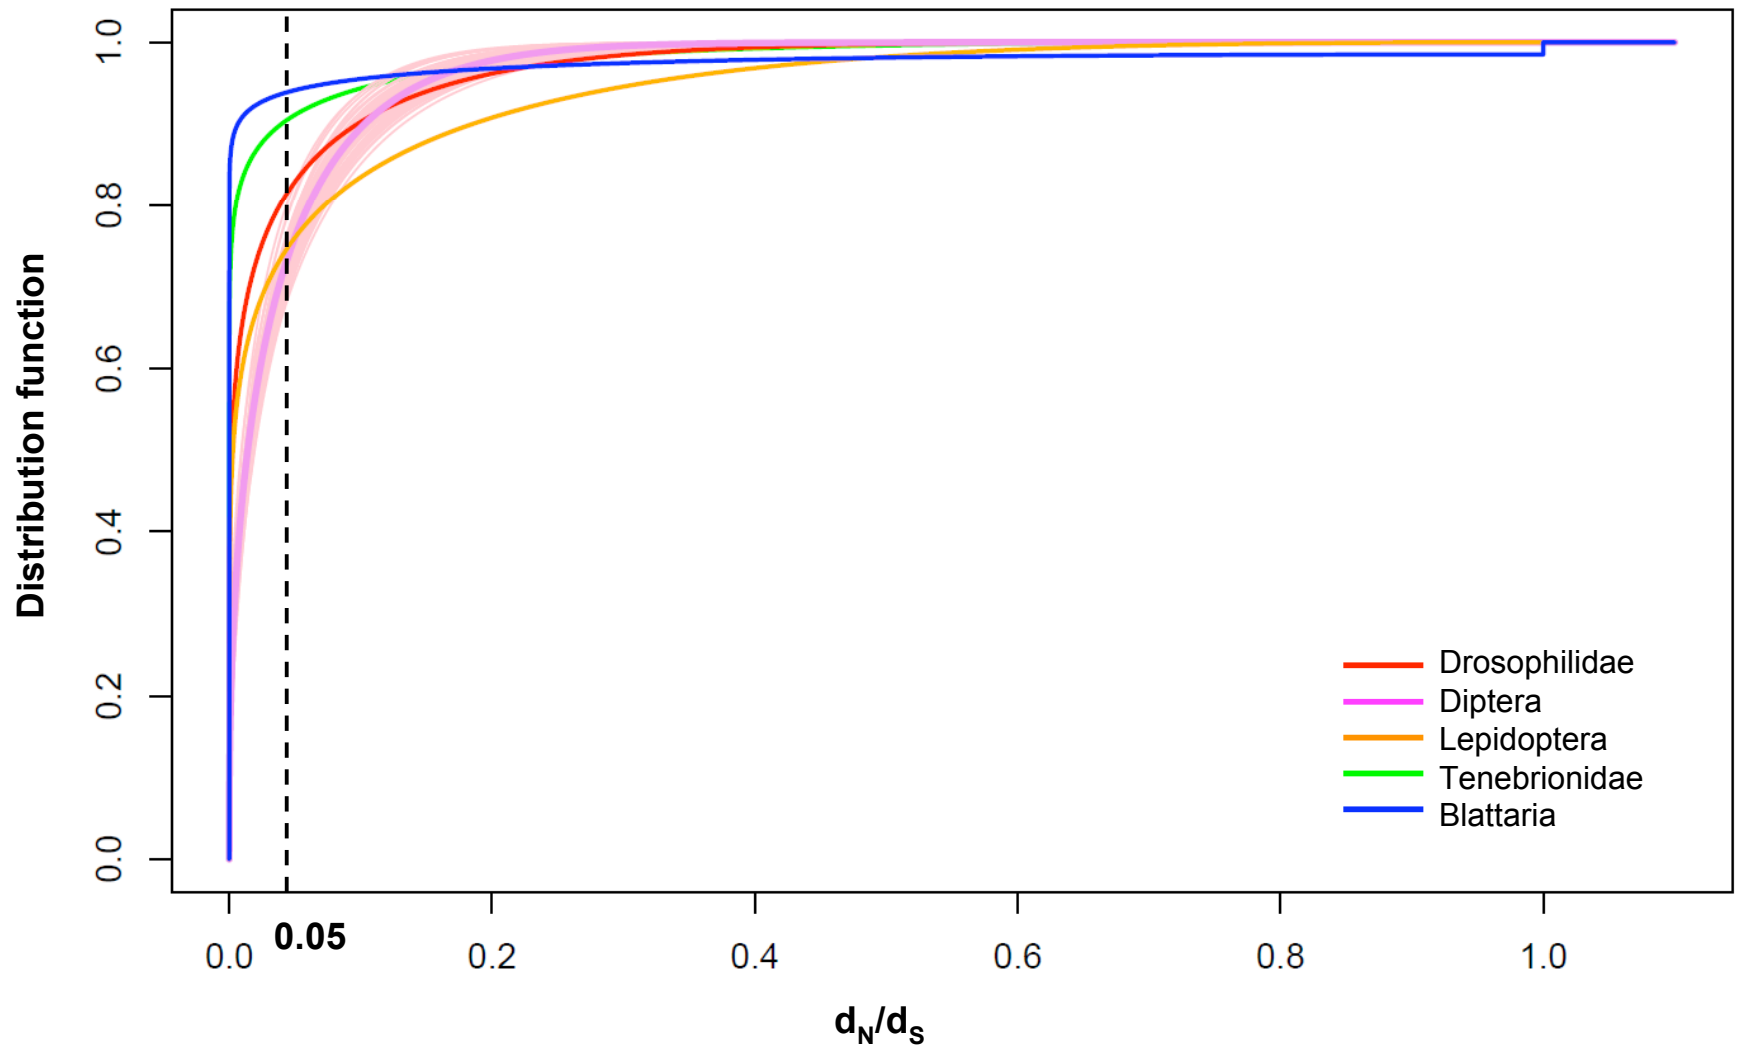

Supplement: 1471-2148-12-199-S4.pdf [file 1471-2148-12-199-S4.pdf]
