# Supplementary material for: Molecular adaptation and resilience of the insect’s nuclear receptor USP
Source: PubMed Central journal article supplement (PMC3520820; doi:10.1186/1471-2148-12-199), 2012-10-05
Supplement: 1471-2148-12-199-S7.pdf [file 1471-2148-12-199-S7.pdf]

| Branch A |     | Branch B |     | Branch C |     |
|----------|-----|----------|-----|----------|-----|
| 1 C      | 0,0 | 1 C      | 0,0 | 31 C     | 0,0 |
| 2 E      | 0,0 | 2 E      | 0,0 | 32 E     | 0,0 |
| 3 G      | 0,0 | 3 G      | 0,0 | 33 G     | 0,0 |
| 4 C      | 0,0 | 4 C      | 0,0 | 34 C     | 0,0 |
| 5 K      | 0,0 | 5 K      | 0,0 | 35 K     | 0,0 |
| 6 G      | 0,0 | 6 G      | 0,0 | 36 G     | 0,0 |
| 7 F      | 0,0 | 7 F      | 0,0 | 37 F     | 0,0 |
| 8 F      | 0,0 | 8 F      | 0,0 | 38 F     | 0,0 |
| 9 K      | 0,0 | 9 K      | 0,0 | 39 K     | 0,0 |
| 10 R     | 0,0 | 10 R     | 0,0 | 40 R     | 0,0 |
| 11 T     | 0,0 | 11 T     | 0,0 | 41 T     | 0,0 |
| 12 V     | 0,0 | 12 V     | 0,0 | 42 V     | 0,0 |
| 13 R     | 0,0 | 13 R     | 0,0 | 43 R     | 0,0 |
| 14 K     | 0,0 | 14 K     | 0,0 | 44 K     | 0,0 |
| 15 D     | 0,0 | 15 D     | 0,0 | 45 D     | 0,0 |
| 16 L     | 0,1 | 16 L     | 0,0 | 46 L     | 0,0 |
| 17 T     | 0,1 | 17 T     | 0,1 | 47 T     | 0,5 |
| 18 Y     | 0,0 | 18 Y     | 0,0 | 48 Y     | 0,0 |
| 19 A     | 0,0 | 19 A     | 0,0 | 49 A     | 0,0 |
| 20 C     | 0,0 | 20 C     | 0,0 | 50 C     | 0,0 |
| 21 R     | 0,0 | 21 R     | 0,0 | 51 R     | 0,0 |
| 22 E     | 0,0 | 22 E     | 0,0 | 52 E     | 0,0 |
| 23 N     | 0,0 | 23 N     | 0,2 | 53 N     | 0,0 |
| 24 R     | 0,4 | 24 R     | 0,0 | 54 R     | 0,1 |
| 25 N     | 0,0 | 25 N     | 0,0 | 55 N     | 0,0 |
| 26 C     | 0,0 | 26 C     | 0,0 | 56 C     | 0,0 |
| 27 I     | 0,1 | 27 I     | 0,0 | 57 I     | 0,1 |
| 28 I     | 0,0 | 28 I     | 0,0 | 58 I     | 0,0 |
| 29 D     | 0,0 | 29 D     | 0,0 | 59 D     | 0,0 |
| 30 K     | 0,0 | 30 K     | 0,0 | 60 K     | 0,0 |
| 31 R     | 0,0 | 31 R     | 0,0 | 61 R     | 0,0 |
| 32 Q     | 0,0 | 32 Q     | 0,0 | 62 Q     | 0,0 |
| 33 R     | 0,0 | 33 R     | 0,0 | 63 R     | 0,0 |
| 34 N     | 0,0 | 34 N     | 0,0 | 64 N     | 0,0 |
| 35 R     | 0,1 | 35 R     | 0,0 | 65 R     | 0,0 |
| 36 C     | 0,0 | 36 C     | 0,0 | 66 C     | 0,0 |
| 37 Q     | 0,0 | 37 Q     | 0,0 | 67 Q     | 0,0 |
| 38 Y     | 0,0 | 38 Y     | 0,0 | 68 Y     | 0,0 |
| 39 C     | 0,0 | 39 C     | 0,0 | 69 C     | 0,0 |
| 40 R     | 0,1 | 40 R     | 0,0 | 70 R     | 0,0 |
| 41 Y     | 0,0 | 41 Y     | 0,0 | 71 Y     | 0,0 |
| 42 Q     | 0,0 | 42 Q     | 0,0 | 72 Q     | 0,0 |
| 43 K     | 0,0 | 43 K     | 0,0 | 73 K     | 0,0 |
| 44 C     | 0,0 | 44 C     | 0,0 | 74 C     | 0,0 |
| 45 L     | 0,1 | 45 L     | 0,0 | 75 L     | 0,0 |

DBD Zinc-finger 1(partial)

DBD Zinc-finger 2

|      |     |      |     |       |     |           |
|------|-----|------|-----|-------|-----|-----------|
| 46 T | 0,0 | 46 T | 0,0 | 76 T  | 0,0 |           |
| 47 C | 1,0 | 47 C | 0,0 | 77 C  | 0,0 |           |
| 48 G | 0,0 | 48 G | 0,0 | 78 G  | 0,0 |           |
| 49 M | 0,0 | 49 M | 0,0 | 79 M  | 0,0 |           |
| 50 K | 0,0 | 50 K | 0,0 | 80 K  | 0,0 |           |
| 51 R | 0,1 | 51 R | 0,0 | 81 R  | 0,0 |           |
| 52 E | 0,0 | 52 E | 0,0 | 82 E  | 0,0 |           |
| 53 A | 0,0 | 53 A | 0,0 | 83 A  | 0,0 |           |
| 54 V | 0,0 | 54 V | 0,0 | 84 V  | 0,0 |           |
| 55 Q | 0,0 | 55 Q | 0,0 | 85 Q  | 0,0 | DBD T-box |
| 56 E | 0,0 | 56 E | 0,0 | 86 E  | 0,0 |           |
| 57 E | 0,0 | 57 E | 0,0 | 87 E  | 0,0 |           |
| 58 R | 0,0 | 58 R | 0,0 | 88 R  | 0,0 |           |
| 59 Q | 0,0 | 59 Q | 0,0 | 89 Q  | 0,0 |           |
| 60 R | 0,1 | 60 R | 0,0 | 90 R  | 0,0 |           |
| 61 G | 1,0 | 61 G | 0,6 | 91 G  | 0,0 |           |
| 62 A | 1,0 | 62 A | 0,0 | 92 A  | 0,1 |           |
| 63 R | 0,6 | 63 R | 0,0 | 93 R  | 0,7 |           |
| 64 D | 1,0 | 64 D | 0,0 | 94 D  | 0,0 |           |
| 65 D | 0,0 | 65 D | 0,0 | 95 D  | 0,0 |           |
| 66 F | 0,1 | 66 F | 1,0 | 96 F  | 0,4 | D domain  |
| 67 M | 1,0 | 67 M | 0,4 | 97 M  | 0,3 |           |
| 68 T | 1,0 | 68 T | 0,0 | 98 T  | 0,2 |           |
| 69 N | 0,1 | 69 N | 0,6 | 99 N  | 0,4 |           |
| 70 S | 0,0 | 70 S | 0,0 | 100 S | 0,0 |           |
| 71 V | 1,0 | 71 V | 0,0 | 101 V | 0,0 |           |
| 72 S | 0,9 | 72 S | 0,0 | 102 S | 0,1 |           |
|      |     |      |     | 103 R | 0,0 |           |
| 73 D | 0,0 | 73 D | 0,3 | 104 D | 0,0 |           |
| 74 F | 1,0 | 74 F | 0,0 | 105 F | 0,3 |           |
| 75 S | 1,0 | 75 S | 0,0 | 106 S | 0,0 |           |
| 76 I | 0,0 | 76 I | 0,0 | 107 I | 0,0 |           |
| 77 E | 0,0 | 77 E | 0,0 | 108 E | 0,0 |           |
| 78 R | 0,1 | 78 R | 0,0 | 109 R | 0,0 |           |
| 79 I | 0,0 | 79 I | 0,7 | 110 I | 0,0 | LBD H1    |
| 80 I | 0,0 | 80 I | 0,0 | 111 I | 0,0 |           |
| 81 E | 0,0 | 81 E | 0,0 | 112 E | 0,0 |           |
| 82 A | 0,1 | 82 A | 1,0 | 113 A | 0,0 |           |
| 83 E | 0,0 | 83 E | 0,0 | 114 E | 0,0 |           |
|      |     |      |     | 115 Q | 0,0 |           |
|      |     |      |     | 116 R | 0,3 |           |
|      |     |      |     | 117 A | 0,9 |           |
|      |     |      |     | 118 E | 0,0 |           |
|      |     |      |     | 119 T | 0,1 |           |
|      |     |      |     | 120 Q | 0,0 |           |
|      |     |      |     | 121 C | 0,0 |           |

|           |           |           |
|-----------|-----------|-----------|
|           |           | 122 G 0,0 |
|           |           | 123 D 0,0 |
|           |           | 124 R 0,0 |
|           |           | 125 A 0,0 |
|           | 84 L 0,5  | 126 L 0,6 |
|           | 85 T 0,0  | 127 T 0,0 |
|           | 86 F 0,0  | 128 F 0,3 |
|           | 87 L 0,0  | 129 L 0,0 |
|           | 88 R 0,0  | 130 R 0,0 |
|           | 89 V 0,0  | 131 V 0,0 |
|           | 90 G 0,0  | 132 G 0,0 |
|           | 91 P 0,0  | 133 P 0,3 |
|           | 92 Y 0,1  | 134 Y 0,0 |
|           | 93 S 0,0  | 135 S 0,0 |
|           | 94 T 0,1  | 136 T 0,0 |
|           | 95 V 0,0  | 137 V 0,3 |
|           | 96 Q 0,0  | 138 Q 0,5 |
|           | 97 P 0,0  | 139 P 0,0 |
|           | 98 D 0,0  | 140 D 0,2 |
|           | 99 Y 0,0  | 141 Y 0,0 |
|           | 100 K 0,8 | 142 K 0,0 |
|           | 101 G 0,0 | 143 G 0,0 |
|           | 102 A 0,0 | 144 A 0,0 |
| 84 V 0,0  | 103 V 0,0 | 145 V 0,0 |
| 85 S 0,6  | 104 S 0,0 | 146 S 0,0 |
| 86 A 0,2  | 105 A 0,8 | 147 A 0,0 |
| 87 L 1,0  | 106 L 0,0 | 148 L 0,0 |
| 88 C 0,0  | 107 C 0,0 | 149 C 0,0 |
| 89 Q 0,0  | 108 Q 0,0 | 150 Q 0,0 |
| 90 V 1,0  | 109 V 0,5 | 151 V 0,0 |
| 91 V 1,0  | 110 V 0,5 | 152 V 0,0 |
| 92 N 0,0  | 111 N 0,0 | 153 N 0,0 |
| 93 K 0,0  | 112 K 0,0 | 154 K 0,0 |
| 94 Q 0,0  | 113 Q 0,0 | 155 Q 0,0 |
| 95 L 0,1  | 114 L 0,0 | 156 L 0,3 |
| 96 F 0,6  | 115 F 0,9 | 157 F 0,0 |
| 97 Q 0,1  | 116 Q 1,0 | 158 Q 0,0 |
| 98 M 0,1  | 117 M 0,0 | 159 M 0,4 |
| 99 V 0,0  | 118 V 0,0 | 160 V 0,3 |
| 100 E 0,0 | 119 E 0,3 | 161 E 0,1 |
| 101 Y 0,0 | 120 Y 1,0 | 162 Y 0,3 |
| 102 A 0,0 | 121 A 0,0 | 163 A 0,0 |
| 103 R 1,0 | 122 R 0,0 | 164 R 0,0 |
| 104 M 1,0 | 123 M 0,0 | 165 M 0,0 |
| 105 M 0,1 | 124 M 0,1 | 166 M 0,6 |
| 106 P 0,0 | 125 P 0,0 | 167 P 0,0 |

LBD H3

|       |     |              |     |              |     |
|-------|-----|--------------|-----|--------------|-----|
| 107 H | 0,0 | 126 H        | 0,0 | 168 H        | 0,0 |
| 108 F | 0,0 | 127 F        | 0,0 | 169 F        | 0,0 |
| 109 A | 0,5 | 128 A        | 0,0 | 170 A        | 0,0 |
| 110 Q | 1,0 | 129 Q        | 0,8 | 171 Q        | 0,4 |
| 111 V | 0,1 | 130 V        | 0,0 | 172 V        | 0,0 |
| 112 P | 0,8 | 131 P        | 0,0 | 173 P        | 0,0 |
| 113 L | 0,1 | 132 L        | 0,0 | 174 L        | 0,0 |
| 114 D | 0,0 | 133 D        | 0,1 | 175 D        | 0,0 |
| 115 D | 0,0 | 134 D        | 0,0 | 176 D        | 0,0 |
| 116 Q | 0,0 | 135 Q        | 0,0 | 177 Q        | 0,0 |
| 117 V | 0,0 | 136 V        | 0,0 | 178 V        | 0,0 |
| 118 I | 0,1 | 137 I        | 0,4 | 179 I        | 0,1 |
| 119 L | 0,1 | 138 L        | 0,0 | 180 L        | 0,0 |
| 120 L | 0,1 | 139 L        | 0,0 | 181 L        | 0,0 |
| 121 K | 0,1 | 140 K        | 0,0 | 182 K        | 0,0 |
| 122 A | 0,0 | 141 A        | 0,0 | 183 A        | 0,9 |
| 123 A | 0,8 | 142 A        | 0,6 | 184 A        | 0,0 |
| 124 W | 0,0 | 143 W        | 0,0 | 185 W        | 0,0 |
| 125 I | 0,0 | 144 I        | 0,0 | 186 I        | 0,0 |
| 126 E | 0,0 | 145 E        | 0,0 | 187 E        | 0,0 |
| 127 L | 0,1 | 146 L        | 0,0 | 188 L        | 0,1 |
| 128 L | 0,1 | 147 L        | 0,0 | 189 L        | 0,0 |
| 129 I | 0,0 | 148 I        | 0,0 | 190 I        | 0,0 |
| 130 A | 0,1 | 149 A        | 1,0 | 191 A        | 0,0 |
| 131 N | 0,0 | 150 N        | 0,3 | 192 N        | 0,1 |
| 132 V | 1,0 | 151 V        | 0,0 | 193 V        | 0,0 |
| 133 A | 1,0 | 152 A        | 0,0 | 194 A        | 0,0 |
| 134 W | 1,0 | 153 W        | 0,0 | 195 W        | 0,0 |
| 135 C | 0,1 | 154 C        | 0,0 | 196 C        | 0,4 |
| 136 S | 0,1 | 155 S        | 1,0 | 197 S        | 0,0 |
| 137 I | 0,1 | 156 I        | 0,0 | 198 I        | 0,0 |
|       |     | 157 V        | 0,0 | 199 V        | 0,0 |
|       |     | 158 S        | 0,0 | 200 S        | 0,4 |
|       |     | 159 L        | 0,0 | 201 L        | 0,4 |
|       |     | 160 <i>D</i> | 0,0 | 202 <i>D</i> | 0,2 |
|       |     | 161 <i>D</i> | 0,9 | 203 <i>D</i> | 0,2 |
|       |     |              |     | 204 <i>S</i> | 0,7 |
|       |     |              |     | 205 <i>P</i> | 0,3 |
|       |     |              |     | 206 <i>G</i> | 0,2 |
|       |     |              |     | 207 <i>L</i> | 0,0 |
|       |     |              |     | 208 Q        | 0,0 |
|       |     | 162 P        | 0,0 | 209 P        | 0,0 |
|       |     | 163 Q        | 0,0 | 210 Q        | 0,0 |
|       |     | 164 Q        | 0,0 | 211 Q        | 0,0 |
|       |     | 165 L        | 0,0 | 212 L        | 0,3 |
|       |     | 166 F        | 0,0 | 213 F        | 0,3 |

LBD H4-H5

residues in italics and boxed:  
not stabilised in the crystals

$\beta$ -s1

|       |     |       |     |       |     |
|-------|-----|-------|-----|-------|-----|
| 138 L | 0,1 | 167 L | 0,0 | 214 L | 0,0 |
| 139 N | 1,0 | 168 N | 0,9 | 215 N | 0,8 |
| 140 Q | 1,0 | 169 Q | 0,0 | 216 Q | 0,2 |
| 141 S | 0,0 | 170 S | 0,0 | 217 S | 0,0 |
| 142 F | 0,7 | 171 F | 0,0 | 218 F | 0,0 |
| 143 S | 0,1 | 172 S | 0,0 | 219 S | 0,4 |
| 144 Y | 1,0 | 173 Y | 0,0 | 220 Y | 0,9 |
| 145 H | 0,0 | 174 H | 0,0 | 221 H | 0,0 |
| 146 R | 0,1 | 175 R | 0,0 | 222 R | 0,0 |
| 147 N | 0,0 | 176 N | 0,0 | 223 N | 0,0 |
| 148 S | 0,1 | 177 S | 1,0 | 224 S | 0,0 |
| 149 A | 0,0 | 178 A | 0,0 | 225 A | 0,0 |
| 150 I | 1,0 | 179 I | 0,5 | 226 I | 0,5 |
| 151 K | 0,0 | 180 K | 0,0 | 227 K | 0,3 |
| 152 A | 0,0 | 181 A | 0,0 | 228 A | 0,0 |
| 153 G | 0,0 | 182 G | 0,0 | 229 G | 0,1 |
| 154 V | 0,0 | 183 V | 0,0 | 230 V | 0,0 |
| 155 S | 0,0 | 184 S | 0,0 | 231 S | 0,0 |
| 156 A | 0,4 | 185 A | 0,0 | 232 A | 0,0 |
| 157 I | 0,0 | 186 I | 0,0 | 233 I | 0,0 |
| 158 F | 0,0 | 187 F | 0,0 | 234 F | 0,0 |
| 159 D | 0,0 | 188 D | 0,0 | 235 D | 0,0 |
| 160 R | 0,1 | 189 R | 0,0 | 236 R | 0,0 |
| 161 I | 0,1 | 190 I | 0,0 | 237 I | 0,0 |
| 162 L | 0,1 | 191 L | 0,0 | 238 L | 0,0 |
| 163 S | 0,1 | 192 S | 0,0 | 239 S | 0,0 |
| 164 E | 0,0 | 193 E | 0,0 | 240 E | 0,0 |
| 165 L | 0,1 | 194 L | 0,0 | 241 L | 0,0 |
| 166 S | 1,0 | 195 S | 1,0 | 242 S | 0,0 |
| 167 V | 0,9 | 196 V | 0,5 | 243 V | 0,0 |
| 168 K | 0,0 | 197 K | 0,0 | 244 K | 0,0 |
| 169 M | 0,0 | 198 M | 0,0 | 245 M | 0,0 |
| 170 K | 0,0 | 199 K | 0,0 | 246 K | 0,0 |
| 171 R | 1,0 | 200 R | 0,1 | 247 R | 0,0 |
| 172 L | 0,0 | 201 L | 0,0 | 248 L | 0,0 |
| 173 N | 0,6 | 202 N | 1,0 | 249 N | 0,2 |
| 174 L | 0,0 | 203 L | 0,2 | 250 L | 0,1 |
| 175 D | 0,0 | 204 D | 0,0 | 251 D | 0,0 |
| 176 R | 0,4 | 205 R | 0,7 | 252 R | 0,0 |
| 177 R | 1,0 | 206 R | 0,0 | 253 R | 0,3 |
| 178 E | 0,0 | 207 E | 0,0 | 254 E | 0,0 |
| 179 L | 0,1 | 208 L | 0,0 | 255 L | 0,0 |
| 180 S | 0,0 | 209 S | 0,4 | 256 S | 0,7 |
| 181 C | 0,0 | 210 C | 0,0 | 257 C | 0,9 |
| 182 L | 0,1 | 211 L | 0,0 | 258 L | 0,0 |
| 183 K | 1,0 | 212 K | 0,0 | 259 K | 0,0 |

β-s2

LBD H6-H7

LBD H8

|       |     |       |     |       |     |
|-------|-----|-------|-----|-------|-----|
| 184 A | 0,2 | 213 A | 0,0 | 260 A | 0,0 |
| 185 I | 0,0 | 214 I | 0,0 | 261 I | 0,0 |
| 186 I | 0,0 | 215 I | 0,0 | 262 I | 0,0 |
| 187 L | 0,1 | 216 L | 0,0 | 263 L | 0,0 |
| 188 Y | 0,0 | 217 Y | 0,0 | 264 Y | 0,0 |
| 189 N | 0,0 | 218 N | 0,0 | 265 N | 0,0 |
| 190 P | 0,0 | 219 P | 0,0 | 266 P | 0,0 |
| 191 D | 0,0 | 220 D | 0,0 | 267 D | 0,0 |
| 192 I | 0,1 | 221 I | 0,4 | 268 I | 0,0 |
| 193 R | 0,0 | 222 R | 0,0 | 269 R | 0,0 |
| 194 G | 0,0 | 223 G | 0,0 | 270 G | 0,0 |
| 195 I | 0,1 | 224 I | 0,0 | 271 I | 0,0 |
| 196 K | 0,0 | 225 K | 0,0 | 272 K | 0,0 |
| 197 S | 1,0 | 226 S | 0,5 | 273 S | 0,0 |
| 198 R | 1,0 | 227 R | 0,0 | 274 R | 0,0 |
| 199 A | 0,0 | 228 A | 0,0 | 275 A | 1,0 |
| 200 E | 0,0 | 229 E | 0,0 | 276 E | 0,1 |
| 201 I | 0,1 | 230 I | 0,0 | 277 I | 0,0 |
| 202 E | 0,8 | 231 E | 0,0 | 278 E | 0,2 |
| 203 M | 1,0 | 232 M | 0,0 | 279 M | 0,0 |
| 204 C | 0,1 | 233 C | 0,0 | 280 C | 1,0 |
| 205 R | 0,1 | 234 R | 0,0 | 281 R | 0,0 |
| 206 E | 0,0 | 235 E | 0,0 | 282 E | 0,0 |
| 207 K | 0,0 | 236 K | 0,0 | 283 K | 0,0 |
| 208 V | 0,1 | 237 V | 0,0 | 284 V | 0,0 |
| 209 Y | 0,0 | 238 Y | 0,0 | 285 Y | 0,0 |
| 210 A | 0,0 | 239 A | 0,0 | 286 A | 0,0 |
| 211 C | 1,0 | 240 C | 0,0 | 287 C | 0,0 |
| 212 L | 0,1 | 241 L | 0,0 | 288 L | 0,0 |
| 213 D | 0,3 | 242 D | 0,0 | 289 D | 0,0 |
| 214 E | 0,0 | 243 E | 0,0 | 290 E | 0,0 |
| 215 H | 0,3 | 244 H | 0,0 | 291 H | 0,0 |
| 216 C | 1,0 | 245 C | 0,0 | 292 C | 0,0 |
| 217 R | 0,0 | 246 R | 0,0 | 293 R | 0,1 |
| 218 L | 0,0 | 247 L | 0,0 | 294 L | 0,0 |
| 219 E | 0,9 | 248 E | 0,3 | 295 E | 0,1 |
| 220 H | 0,0 | 249 H | 0,5 | 296 H | 0,0 |
| 221 P | 0,0 | 250 P | 0,7 | 297 P | 0,0 |
| 222 G | 0,9 | 251 G | 0,0 | 298 G | 0,8 |
| 223 D | 0,0 | 252 D | 0,0 | 299 D | 0,2 |
| 224 D | 1,0 | 253 D | 0,0 | 300 D | 0,0 |
| 225 G | 0,0 | 254 G | 0,0 | 301 G | 0,0 |
| 226 R | 0,1 | 255 R | 0,0 | 302 R | 0,0 |
| 227 F | 0,0 | 256 F | 0,0 | 303 F | 0,0 |
| 228 A | 0,0 | 257 A | 0,0 | 304 A | 0,0 |
| 229 Q | 1,0 | 258 Q | 0,4 | 305 Q | 0,0 |

LBD H9

|       |     |       |     |       |     |
|-------|-----|-------|-----|-------|-----|
| 230 L | 0,1 | 259 L | 0,0 | 306 L | 0,0 |
| 231 L | 0,1 | 260 L | 0,0 | 307 L | 0,0 |
| 232 L | 0,1 | 261 L | 0,0 | 308 L | 0,0 |
| 233 R | 0,0 | 262 R | 0,0 | 309 R | 0,0 |
| 234 L | 0,1 | 263 L | 0,0 | 310 L | 0,0 |
| 235 P | 0,0 | 264 P | 0,0 | 311 P | 0,0 |
| 236 A | 0,0 | 265 A | 0,0 | 312 A | 0,0 |
| 237 L | 0,1 | 266 L | 0,0 | 313 L | 0,0 |
| 238 R | 0,0 | 267 R | 0,0 | 314 R | 0,0 |
| 239 S | 0,0 | 268 S | 0,0 | 315 S | 0,0 |
| 240 I | 0,0 | 269 I | 0,0 | 316 I | 0,0 |
| 241 S | 1,0 | 270 S | 0,0 | 317 S | 0,0 |
| 242 L | 0,1 | 271 L | 0,0 | 318 L | 0,0 |
| 243 K | 0,0 | 272 K | 0,0 | 319 K | 0,0 |
| 244 C | 0,0 | 273 C | 0,0 | 320 C | 0,0 |
| 245 Q | 0,1 | 274 Q | 0,3 | 321 Q | 0,0 |
| 246 D | 0,0 | 275 D | 0,3 | 322 D | 0,0 |
| 247 H | 0,0 | 276 H | 0,0 | 323 H | 0,0 |
| 248 L | 0,1 | 277 L | 0,0 | 324 L | 0,0 |
| 249 F | 0,0 | 278 F | 0,0 | 325 F | 0,0 |
| 250 L | 0,0 | 279 L | 0,0 | 326 L | 0,0 |
| 251 F | 0,0 | 280 F | 0,0 | 327 F | 0,0 |
| 252 R | 0,0 | 281 R | 0,0 | 328 R | 0,0 |
| 253 I | 0,1 | 282 I | 0,0 | 329 I | 0,0 |
| 254 T | 0,0 | 283 T | 0,2 | 330 T | 0,0 |
| 255 S | 0,0 | 284 S | 0,0 | 331 S | 0,0 |
| 256 D | 0,0 | 285 D | 0,0 | 332 D | 0,0 |
|       |     |       |     | 333 R | 0,3 |
| 258 P | 0,0 | 286 P | 0,0 | 334 P | 0,7 |
| 259 L | 0,1 | 287 L | 0,6 | 335 L | 0,0 |
| 260 E | 0,3 | 288 E | 0,0 | 336 E | 0,0 |
| 261 E | 0,1 | 289 E | 0,6 | 337 E | 0,9 |
| 262 L | 0,0 | 290 L | 0,4 | 338 L | 0,3 |
|       |     |       |     | 339 F | 0,0 |
|       |     |       |     | 340 L | 0,1 |
|       |     |       |     | 341 E | 0,0 |
|       |     |       |     | 342 Q | 0,4 |
|       |     |       |     | 343 L | 0,0 |
|       |     |       |     | 344 E | 0,2 |
|       |     |       |     | 345 A | 0,1 |
|       |     |       |     | 346 P | 0,0 |

LBD H10-H11

LBD H12

Table S6
